# Supplementary material for: Unification of multi-species vertebrate anatomy ontologies for comparative biology in Uberon
Source: Springer Nature journal article supplement (doi:10.1186/2041-1480-5-21), 2014-01-01

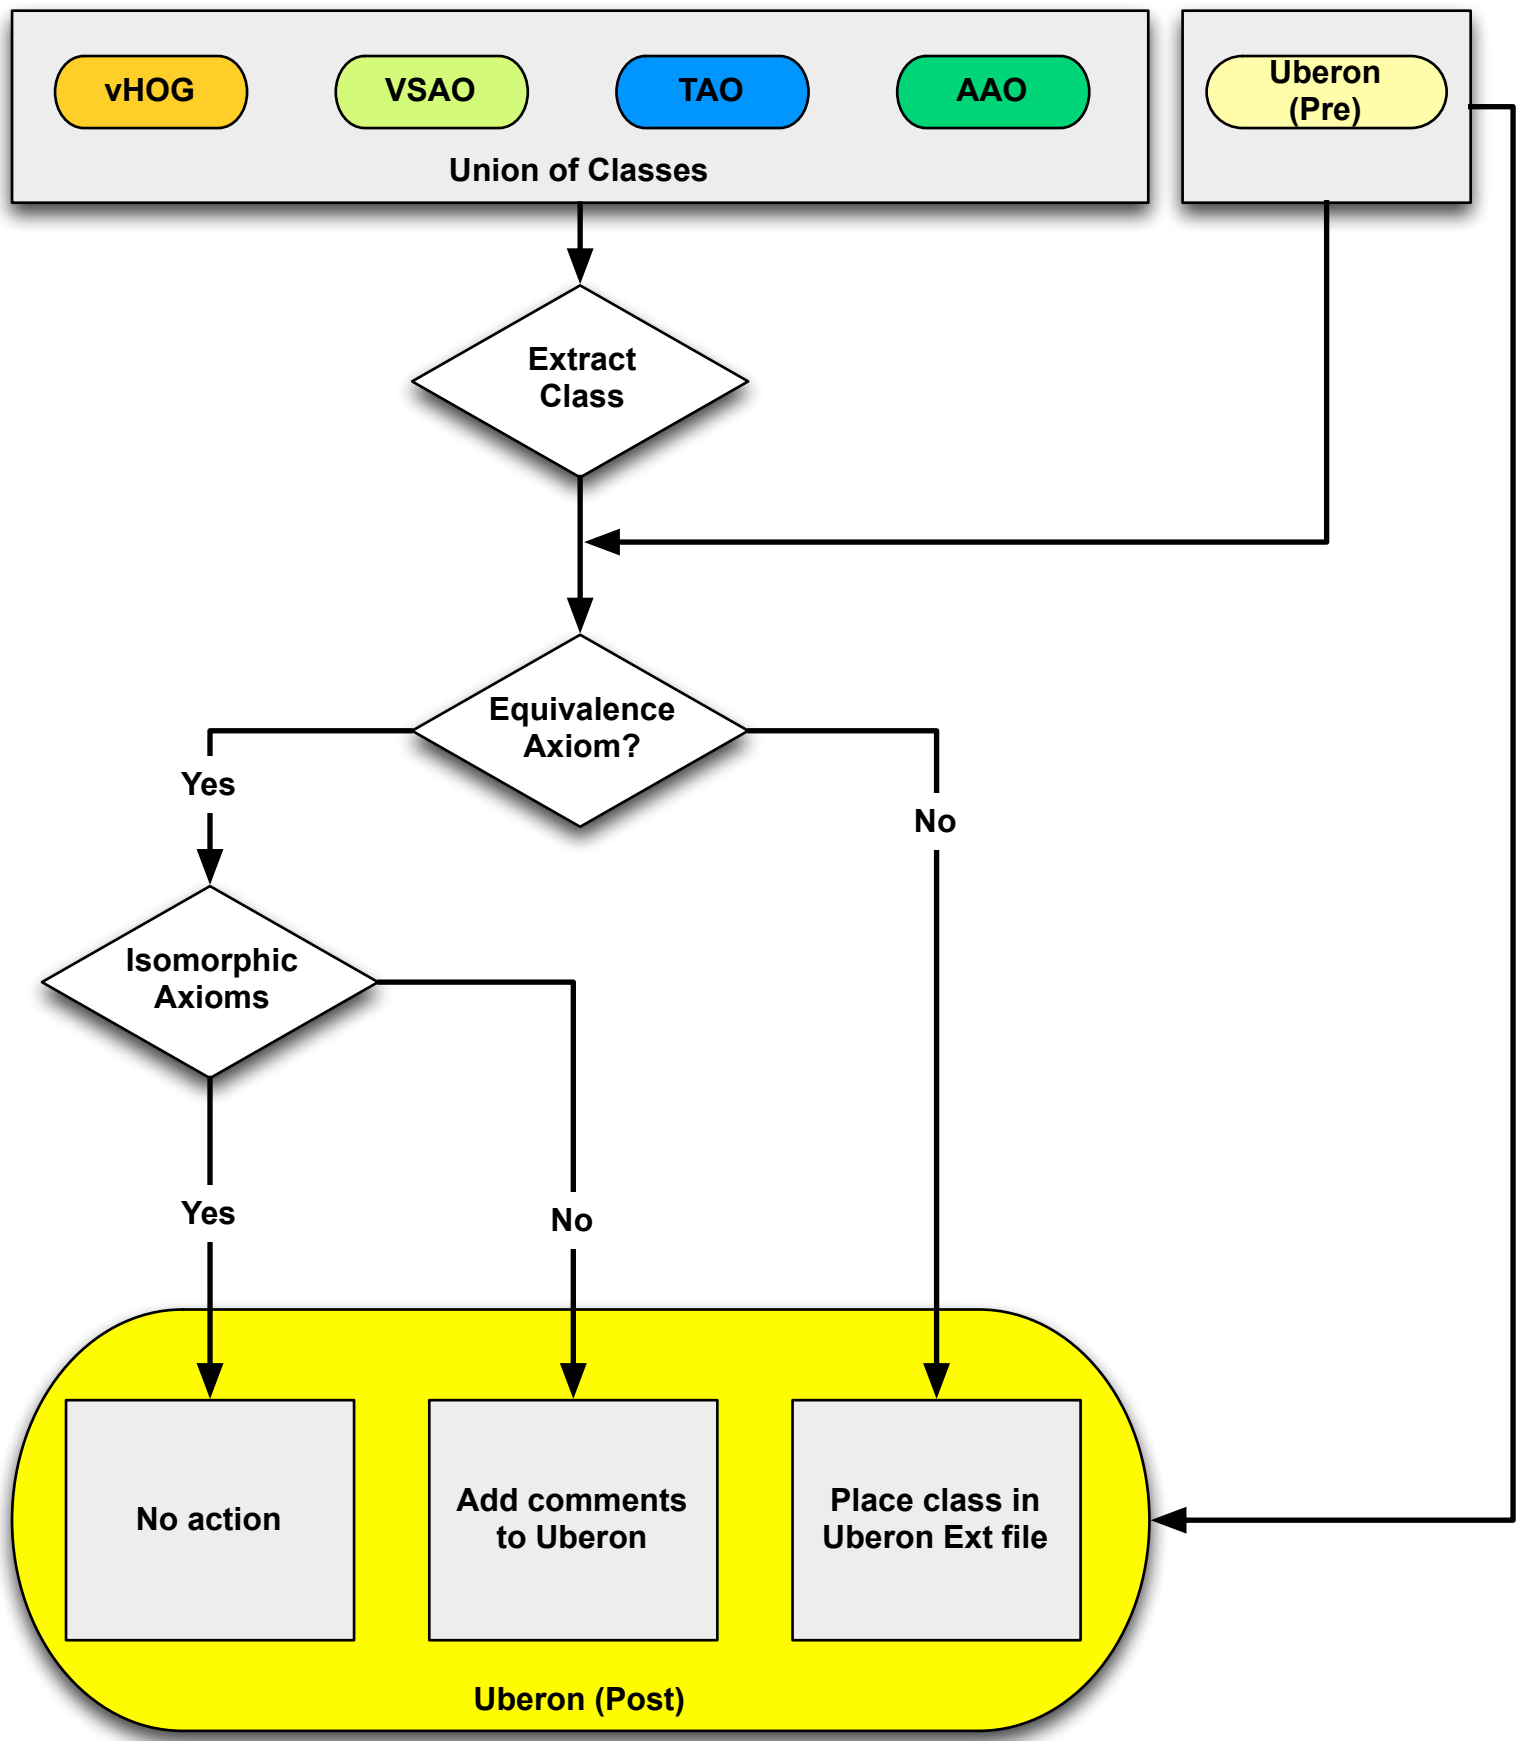

Supplement: 13326_2013_174_MOESM6_ESM.pdf [file 13326_2013_174_MOESM6_ESM.pdf]
