# Supplementary material for: Unification of multi-species vertebrate anatomy ontologies for comparative biology in Uberon
Source: Springer Nature journal article supplement (doi:10.1186/2041-1480-5-21), 2014-01-01
Supplement: 13326_2013_174_MOESM7_ESM.pdf [file 13326_2013_174_MOESM7_ESM.pdf]

A)

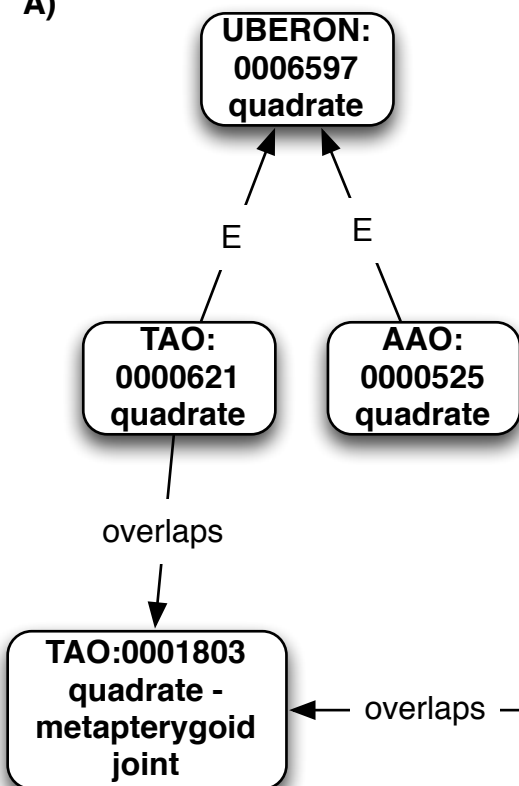**Class:** Uberon:quadrate**Class:** TAO:quadrate**SubClassOf:** overlaps **some** TAO:'q-m joint'**EquivalentTo:** Uberon:quadrate **and** part\_of **some** Teleost**Class:** TAO:'q-m joint'**Class:** TAO:metapterygoid**SubClassOf:** overlaps **some** TAO:'q-m joint'**Class:** AAO:quadrate**EquivalentTo:** Uberon:quadrate **and** part\_of **some** Amphibian

B)

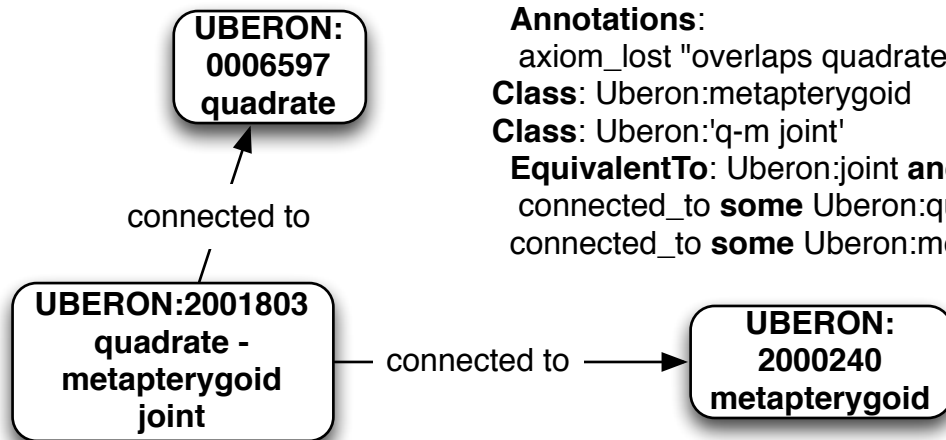**Class:** Uberon:quadrate**Annotations:**

axiom\_lost "overlaps quadrate-metapterygoid joint (TAO)"

**Class:** Uberon:metapterygoid**Class:** Uberon:'q-m joint'**EquivalentTo:** Uberon:joint **and**connected\_to **some** Uberon:quadrate **and**connected\_to **some** Uberon:metapterygoid
